# Supplementary material
Source: PubMed Central journal article supplement (PMC7089814)
Supplement: NIHMS1560778-supplement-1.pdf [file NIHMS1560778-supplement-1.pdf]

**Appendix**  
**Prenatal Drinking in the Northern Plains:**  
**Differences Between American Indian and Caucasian Mothers**  
**Ye et al.**

**Appendix Table 1.** Variables Included in Logistic Regression Models

| Variables                       | Values assigned |
|---------------------------------|-----------------|
| <b>Demographics</b>             |                 |
| Race                            |                 |
| Caucasian                       | 0               |
| American Indian                 | 1               |
| Ethnicity                       |                 |
| Not Hispanic or Latina          | no              |
| Hispanic or Latina              | yes             |
| Age, years                      |                 |
| <20                             | 1               |
| 20–34                           | 2               |
| ≥35                             | 3               |
| Marital status                  |                 |
| Single                          | no              |
| Married or partnered            | yes             |
| Education                       |                 |
| Any primary school              | 1               |
| Some high school                | 2               |
| Completed high school           | 3               |
| Beyond high school              | 4               |
| Partner education               |                 |
| Any primary school              | 1               |
| Some high school                | 2               |
| Completed high school           | 3               |
| Beyond high school              | 4               |
| Reproductive history            |                 |
| Gravidity                       |                 |
| 1                               | 1               |
| 2                               | 2               |
| 3                               | 3               |
| >3                              | 4               |
| Parity                          |                 |
| 0                               | 0               |
| 1                               | 1               |
| 2                               | 2               |
| >2                              | 3               |
| Fertility treatment             |                 |
| No                              | no              |
| Yes                             | yes             |
| Prenatal care                   |                 |
| Prenatal care in all trimesters |                 |
| No                              | no              |
| Yes                             | yes             |
| Mental health                   |                 |
| Anxiety                         |                 |

**Appendix**  
**Prenatal Drinking in the Northern Plains:**  
**Differences Between American Indian and Caucasian Mothers**  
**Ye et al.**

|                                   |     |
|-----------------------------------|-----|
| No                                | no  |
| Yes                               | yes |
| Depression                        |     |
| No                                | no  |
| Yes                               | yes |
| SES                               |     |
| Health coverage                   |     |
| Commercial insurance              | 1   |
| Self-pay                          | 2   |
| Public assistance                 | 3   |
| Government support                |     |
| None                              | 0   |
| Prenatal only                     | 1   |
| Postnatal only                    | 2   |
| Both                              | 3   |
| Household monthly income, dollars |     |
| 250                               | 1   |
| 750                               | 2   |
| 1,500                             | 3   |
| >2,500                            | 4   |
| Relocation within a year          |     |
| None                              | 0   |
| Once                              | 1   |
| More than once                    | 2   |

**Appendix**  
**Prenatal Drinking in the Northern Plains:**  
**Differences Between American Indian and Caucasian Mothers**  
**Ye et al.**

**Appendix Table 2.** The Sample Size of Women by Race Drinking Before, During, and After Pregnancy

| <b>Time frame</b>                | <b>American Indian, n (%)</b><br><b>2,124 (44)</b> | <b>Caucasian, n (%)</b><br><b>2,753 (56)</b> |
|----------------------------------|----------------------------------------------------|----------------------------------------------|
| <b>Entire pregnancy</b>          |                                                    |                                              |
| No                               | 927 (48)                                           | 987 (37)                                     |
| Yes                              | 1,023 (52)                                         | 1,692 (63)                                   |
| <b>1 year prior to pregnancy</b> |                                                    |                                              |
| No                               | 42 (3)                                             | 30 (1)                                       |
| Yes                              | 1,610 (97)                                         | 2,463 (99)                                   |
| <b>LMP</b>                       |                                                    |                                              |
| No                               | 1,252 (60)                                         | 1,114 (41)                                   |
| Yes                              | 852 (40)                                           | 1,633 (59)                                   |
| <b>First trimester</b>           |                                                    |                                              |
| No                               | 1,127 (53)                                         | 1,113 (40)                                   |
| Yes                              | 996 (47)                                           | 1,638 (60)                                   |
| <b>Second trimester</b>          |                                                    |                                              |
| No                               | 1,873 (96)                                         | 2,514 (93)                                   |
| Yes                              | 71 (4)                                             | 193 (7)                                      |
| <b>Third trimester</b>           |                                                    |                                              |
| No                               | 1,696 (99)                                         | 2,376 (94)                                   |
| Yes                              | 11 (1)                                             | 147 (6)                                      |
| <b>1 month post-delivery</b>     |                                                    |                                              |
| No                               | 1,034 (85)                                         | 1,404 (61)                                   |
| Yes                              | 179 (15)                                           | 892 (39)                                     |

LMP, last menstrual period.

**Appendix**  
**Prenatal Drinking in the Northern Plains:**  
**Differences Between American Indian and Caucasian Mothers**  
**Ye et al.**

**Appendix Table 3.** The Sample Size of Women by Race Binge Drinking During and After Pregnancy

| <b>Time frame</b>            | <b>American Indian, n (%)</b><br><b>2,124 (44)</b> | <b>Caucasian, n (%)</b><br><b>2,753 (56)</b> |
|------------------------------|----------------------------------------------------|----------------------------------------------|
| <b>Entire pregnancy</b>      |                                                    |                                              |
| No                           | 1,112 (59)                                         | 1,886 (72)                                   |
| Yes                          | 786 (41)                                           | 717 (28)                                     |
| <b>LMP</b>                   |                                                    |                                              |
| No                           | 1,443 (69)                                         | 2,088 (76)                                   |
| Yes                          | 661 (31)                                           | 659 (24)                                     |
| <b>First trimester</b>       |                                                    |                                              |
| No                           | 1,359 (64)                                         | 2,036 (74)                                   |
| Yes                          | 764 (36)                                           | 715 (26)                                     |
| <b>Second trimester</b>      |                                                    |                                              |
| No                           | 1,904 (98)                                         | 2,706 (100)                                  |
| Yes                          | 40 (2)                                             | 1 (0)                                        |
| <b>Third trimester</b>       |                                                    |                                              |
| No                           | 1,702 (100)                                        | 2,521 (100)                                  |
| Yes                          | 5 (0)                                              | 2 (0)                                        |
| <b>1 month post-delivery</b> |                                                    |                                              |
| No                           | 1,123 (93)                                         | 2,174 (95)                                   |
| Yes                          | 90 (7)                                             | 122 (5)                                      |

LMP, last menstrual period.

**Appendix**  
**Prenatal Drinking in the Northern Plains:**  
**Differences Between American Indian and Caucasian Mothers**  
**Ye et al.**

**Appendix Table 4.** Total Drinking Days During and After Pregnancy by Race for Those Who Consumed Alcoholic Beverages

| <b>Time frame</b>            | <b>American Indian</b> | <b>Caucasian</b> |
|------------------------------|------------------------|------------------|
| <b>LMP</b>                   |                        |                  |
| Median                       | 1                      | 2                |
| Mean                         | 3                      | 3                |
| Range                        | 1–31                   | 1–31             |
| <b>First trimester</b>       |                        |                  |
| Median                       | 1                      | 2                |
| Mean                         | 3                      | 3                |
| Range                        | 1–38                   | 1–42             |
| <b>Second trimester</b>      |                        |                  |
| Median                       | 1                      | 2                |
| Mean                         | 3                      | 3                |
| Range                        | 1–38                   | 1–42             |
| <b>Third trimester</b>       |                        |                  |
| Median                       | 1                      | 2                |
| Mean                         | 3                      | 3                |
| Range                        | 1–38                   | 1–42             |
| <b>1 month post-delivery</b> |                        |                  |
| Median                       | 1                      | 1                |
| Mean                         | 1                      | 2                |
| Range                        | 1–15                   | 1–31             |

*Note:* Wilcoxon rank-sum test to test race differences in drinking days:  $p < 0.05$  at all time frames.

LMP, last menstrual period.

**Appendix**  
**Prenatal Drinking in the Northern Plains:**  
**Differences Between American Indian and Caucasian Mothers**  
**Ye et al.**

**Appendix Table 5.** Association of Drinking During and After Pregnancy With Race and Other Maternal Characteristics

| Variables <sup>a</sup>              | LMP                                |                                    | First trimester                    |                                    | Second trimester                   |                                    | Third trimester                     |                                    | 1 month post-delivery              |                                    |
|-------------------------------------|------------------------------------|------------------------------------|------------------------------------|------------------------------------|------------------------------------|------------------------------------|-------------------------------------|------------------------------------|------------------------------------|------------------------------------|
|                                     | OR<br>(95% CI)                     | AOR<br>(95% CI)                    | OR<br>(95% CI)                     | AOR<br>(95% CI)                    | OR<br>(95% CI)                     | AOR<br>(95% CI)                    | OR<br>(95% CI)                      | AOR<br>(95% CI)                    | OR<br>(95% CI)                     | AOR<br>(95% CI)                    |
| American Indian,<br>ref=Caucasian   | <b>0.46</b><br><b>(0.41, 0.52)</b> | 0.81<br>(0.63, 1.05)               | <b>0.60</b><br><b>(0.54, 0.67)</b> | 0.85<br>(0.66, 1.10)               | <b>0.49</b><br><b>(0.37, 0.65)</b> | <b>0.52</b><br><b>(0.28, 0.93)</b> | <b>0.10</b><br><b>(0.05, 0.18)</b>  | <b>0.10</b><br><b>(0.02, 0.30)</b> | <b>0.27</b><br><b>(0.23, 0.33)</b> | <b>0.30</b><br><b>(0.22, 0.41)</b> |
| Hispanic, ref=no                    | 0.81<br>(0.61, 1.08)               | 1.35<br>(0.85, 2.13)               | 0.94<br>(0.71, 1.24)               | 1.11<br>(0.70, 1.75)               | 1.26<br>(0.67, 2.16)               | 2.26<br>(0.91, 4.85)               | 0.32<br>(0.05, 1.01)                | 1.24<br>(0.19, 4.36)               | 0.99<br>(0.65, 1.48)               | <b>2.01</b><br><b>(1.21, 3.29)</b> |
| Age                                 | <b>1.23</b><br><b>(1.08, 1.41)</b> | 1.18<br>(0.95, 1.46)               | <b>1.25</b><br><b>(1.10, 1.43)</b> | <b>1.44</b><br><b>(1.16, 1.79)</b> | <b>1.83</b><br><b>(1.37, 2.45)</b> | <b>2.02</b><br><b>(1.33, 3.04)</b> | <b>2.82</b><br><b>(1.96, 4.01)</b>  | <b>2.44</b><br><b>(1.50, 3.89)</b> | <b>1.34</b><br><b>(1.12, 1.60)</b> | 1.18<br>(0.93, 1.50)               |
| Married or partnered,<br>ref=single | <b>1.30</b><br><b>(1.12, 1.52)</b> | 0.97<br>(0.72, 1.32)               | 0.99<br>(0.84, 1.15)               | 0.98<br>(0.73, 1.33)               | 1.43<br>(0.99, 2.16)               | 1.05<br>(0.53, 2.31)               | <b>5.49</b><br><b>(2.50, 15.53)</b> | 4.26<br>(0.88, 76.86)              | <b>1.70</b><br><b>(1.35, 2.16)</b> | 0.99<br>(0.69, 1.44)               |
| Education                           | <b>1.47</b><br><b>(1.37, 1.58)</b> | 1.11<br>(0.97, 1.26)               | <b>1.28</b><br><b>(1.19, 1.37)</b> | 1.02<br>(0.89, 1.16)               | <b>1.45</b><br><b>(1.23, 1.74)</b> | 1.35<br>(0.97, 1.93)               | <b>2.60</b><br><b>(1.91, 3.68)</b>  | <b>2.36</b><br><b>(1.23, 5.28)</b> | <b>1.65</b><br><b>(1.48, 1.83)</b> | 0.92<br>(0.78, 1.09)               |
| Partner education                   | <b>1.45</b><br><b>(1.33, 1.57)</b> | 1.03<br>(0.90, 1.18)               | <b>1.32</b><br><b>(1.21, 1.43)</b> | 0.93<br>(0.82, 1.07)               | <b>1.39</b><br><b>(1.14, 1.71)</b> | 0.97<br>(0.72, 1.31)               | <b>2.26</b><br><b>(1.67, 3.16)</b>  | 1.17<br>(0.78, 1.83)               | <b>1.52</b><br><b>(1.35, 1.70)</b> | 0.99<br>(0.85, 1.15)               |
| Gravidity                           | <b>0.80</b><br><b>(0.76, 0.85)</b> | 0.96<br>(0.84, 1.10)               | <b>0.81</b><br><b>(0.77, 0.85)</b> | 0.97<br>(0.85, 1.11)               | 1.08<br>(0.97, 1.20)               | 1.05<br>(0.79, 1.36)               | 1.05<br>(0.92, 1.21)                | 1.05<br>(0.77, 1.41)               | <b>0.87</b><br><b>(0.82, 0.93)</b> | 1.06<br>(0.92, 1.22)               |
| Parity                              | <b>0.77</b><br><b>(0.73, 0.81)</b> | <b>0.84</b><br><b>(0.72, 0.97)</b> | <b>0.78</b><br><b>(0.74, 0.83)</b> | <b>0.77</b><br><b>(0.67, 0.90)</b> | 1.02<br>(0.91, 1.14)               | 0.97<br>(0.72, 1.31)               | 1.00<br>(0.86, 1.15)                | 1.01<br>(0.73, 1.43)               | <b>0.81</b><br><b>(0.76, 0.87)</b> | <b>0.82</b><br><b>(0.70, 0.97)</b> |
| Fertility treatment, ref=no         | 0.89<br>(0.65, 1.22)               | <b>0.56</b><br><b>(0.40, 0.81)</b> | <b>0.64</b><br><b>(0.47, 0.88)</b> | <b>0.43</b><br><b>(0.30, 0.61)</b> | 0.65<br>(0.25, 1.36)               | 0.55<br>(0.21, 1.18)               | 0.53<br>(0.13, 1.41)                | <b>0.31</b><br><b>(0.07, 0.85)</b> | 1.07<br>(0.74, 1.53)               | 0.73<br>(0.50, 1.05)               |
| Prenatal care, ref=no               | <b>1.82</b><br><b>(1.58, 2.11)</b> | 1.04<br>(0.82, 1.31)               | <b>1.36</b><br><b>(1.18, 1.57)</b> | 0.82<br>(0.65, 1.05)               | 0.85<br>(0.63, 1.17)               | <b>0.49</b><br><b>(0.31, 0.80)</b> | <b>3.34</b><br><b>(1.85, 6.81)</b>  | 1.01<br>(0.48, 2.49)               | <b>1.84</b><br><b>(1.48, 2.30)</b> | 0.93<br>(0.70, 1.24)               |
| Anxiety, ref=no                     | <b>0.83</b><br><b>(0.71, 0.96)</b> | 1.07<br>(0.85, 1.35)               | 0.90<br>(0.78, 1.05)               | 0.97<br>(0.77, 1.23)               | 1.29<br>(0.95, 1.74)               | 0.94<br>(0.56, 1.52)               | 0.80<br>(0.51, 1.21)                | 1.07<br>(0.56, 1.92)               | 0.90<br>(0.74, 1.10)               | 1.27<br>(0.98, 1.64)               |
| Depression, ref=no                  | <b>0.80</b><br><b>(0.66, 0.96)</b> | 0.87<br>(0.64, 1.17)               | 0.88<br>(0.73, 1.07)               | 1.00<br>(0.74, 1.33)               | <b>1.77</b><br><b>(1.24, 2.47)</b> | 1.68<br>(0.91, 2.99)               | 1.00<br>(0.58, 1.63)                | 1.54<br>(0.68, 3.20)               | 0.79<br>(0.61, 1.02)               | 0.84<br>(0.59, 1.19)               |
| Health coverage                     | <b>0.69</b><br><b>(0.65, 0.74)</b> | 0.91<br>(0.78, 1.05)               | <b>0.78</b><br><b>(0.73, 0.83)</b> | 1.03<br>(0.89, 1.20)               | <b>0.77</b><br><b>(0.68, 0.88)</b> | 1.05<br>(0.78, 1.39)               | <b>0.56</b><br><b>(0.47, 0.67)</b>  | 0.99<br>(0.70, 1.37)               | <b>0.67</b><br><b>(0.62, 0.72)</b> | 1.06<br>(0.91, 1.23)               |
| Government support                  | <b>0.77</b><br><b>(0.73, 0.81)</b> | 0.94<br>(0.84, 1.04)               | <b>0.80</b><br><b>(0.76, 0.84)</b> | <b>0.83</b><br><b>(0.75, 0.92)</b> | <b>0.81</b><br><b>(0.73, 0.90)</b> | 0.83<br>(0.67, 1.03)               | <b>0.67</b><br><b>(0.58, 0.76)</b>  | 1.01<br>(0.78, 1.29)               | <b>0.74</b><br><b>(0.71, 0.78)</b> | 0.94<br>(0.84, 1.05)               |
| Household income                    | <b>1.35</b><br><b>(1.27, 1.44)</b> | <b>1.16</b><br><b>(1.03, 1.31)</b> | <b>1.23</b><br><b>(1.15, 1.30)</b> | <b>1.13</b><br><b>(1.00, 1.26)</b> | <b>1.19</b><br><b>(1.04, 1.38)</b> | 0.90<br>(0.68, 1.19)               | <b>1.77</b><br><b>(1.42, 2.28)</b>  | 0.90<br>(0.57, 1.46)               | <b>1.66</b><br><b>(1.51, 1.83)</b> | <b>1.23</b><br><b>(1.06, 1.43)</b> |
| Relocation                          | 0.98<br>(0.90, 1.06)               | 1.10<br>(0.98, 1.23)               | 1.04<br>(0.96, 1.13)               | <b>1.13</b><br><b>(1.01, 1.27)</b> | 1.00<br>(0.84, 1.18)               | 1.22<br>(0.95, 1.54)               | <b>0.75</b><br><b>(0.58, 0.94)</b>  | 0.98<br>(0.70, 1.34)               | 0.93<br>(0.84, 1.03)               | 1.08<br>(0.95, 1.23)               |

Note: Boldface indicates statistical significance (95% CI not including 1).

<sup>a</sup>Values assigned to each variable are in Appendix Table 1.

LMP, last menstrual period.

**Appendix**  
**Prenatal Drinking in the Northern Plains:**  
**Differences Between American Indian and Caucasian Mothers**  
**Ye et al.**

**Appendix Table 6.** Associations of Binge Drinking During and After Pregnancy With Race and Other Maternal Characteristics

| Variables <sup>a</sup>           | LMP                      |                          | First trimester          |                          | 1 month post-delivery    |                          |
|----------------------------------|--------------------------|--------------------------|--------------------------|--------------------------|--------------------------|--------------------------|
|                                  | OR (95% CI)              | AOR (95% CI)             | OR (95% CI)              | AOR (95% CI)             | OR (95% CI)              | AOR (95% CI)             |
| American Indian, ref=Caucasian   | <b>1.45 (1.28, 1.65)</b> | <b>1.40 (1.05, 1.86)</b> | <b>1.60 (1.42, 1.81)</b> | <b>1.35 (1.03, 1.79)</b> | <b>1.43 (1.08, 1.89)</b> | 0.85 (0.53, 1.37)        |
| Hispanic, ref=no                 | 1.14 (0.84, 1.55)        | 0.84 (0.49, 1.37)        | 1.29 (0.95, 1.72)        | 0.85 (0.51, 1.38)        | <b>2.11 (1.11, 3.69)</b> | 2.01 (0.97, 3.82)        |
| Age                              | 0.90 (0.77, 1.04)        | <b>1.28 (1.01, 1.63)</b> | <b>0.85 (0.73, 0.98)</b> | 1.21 (0.96, 1.53)        | 0.82 (0.59, 1.15)        | <b>1.62 (1.06, 2.47)</b> |
| Married or partnered, ref=single | <b>0.61 (0.52, 0.72)</b> | 0.76 (0.55, 1.04)        | <b>0.55 (0.47, 0.66)</b> | 0.80 (0.59, 1.09)        | <b>0.62 (0.44, 0.90)</b> | 0.70 (0.43, 1.17)        |
| Education                        | <b>0.89 (0.83, 0.96)</b> | 0.96 (0.83, 1.11)        | <b>0.83 (0.77, 0.89)</b> | 0.96 (0.83, 1.11)        | <b>0.73 (0.63, 0.85)</b> | <b>0.71 (0.55, 0.92)</b> |
| Partner education                | <b>0.86 (0.78, 0.94)</b> | 0.96 (0.83, 1.11)        | <b>0.85 (0.78, 0.93)</b> | 0.92 (0.80, 1.06)        | <b>0.66 (0.55, 0.79)</b> | 0.81 (0.63, 1.04)        |
| Gravidity                        | <b>0.92 (0.87, 0.97)</b> | 1.10 (0.95, 1.27)        | <b>0.92 (0.87, 0.97)</b> | 1.00 (0.86, 1.16)        | 0.93 (0.82, 1.05)        | 1.07 (0.80, 1.40)        |
| Parity                           | <b>0.91 (0.86, 0.96)</b> | <b>0.76 (0.64, 0.89)</b> | <b>0.92 (0.87, 0.97)</b> | <b>0.83 (0.70, 0.98)</b> | 0.91 (0.80, 1.04)        | 0.73 (0.54, 1.00)        |
| Fertility treatment, ref=no      | <b>0.42 (0.26, 0.65)</b> | <b>0.52 (0.31, 0.82)</b> | <b>0.27 (0.16, 0.43)</b> | <b>0.34 (0.19, 0.56)</b> | <b>0.21 (0.03, 0.67)</b> | 0.31 (0.05, 1.02)        |
| Prenatal care, ref=no            | 1.00 (0.85, 1.17)        | 1.12 (0.86, 1.46)        | 0.86 (0.74, 1.00)        | 0.96 (0.75, 1.24)        | 0.89 (0.62, 1.31)        | 1.15 (0.73, 1.88)        |
| Anxiety, ref=no                  | <b>1.34 (1.14, 1.58)</b> | 1.27 (0.99, 1.62)        | <b>1.41 (1.20, 1.65)</b> | 1.12 (0.87, 1.43)        | <b>1.76 (1.26, 2.44)</b> | 1.39 (0.90, 2.10)        |
| Depression, ref=no               | <b>1.32 (1.07, 1.61)</b> | 0.94 (0.68, 1.29)        | <b>1.30 (1.07, 1.59)</b> | 1.02 (0.75, 1.39)        | <b>1.58 (1.02, 2.36)</b> | 0.88 (0.49, 1.51)        |
| Health coverage                  | <b>1.19 (1.11, 1.27)</b> | 1.06 (0.90, 1.25)        | <b>1.24 (1.16, 1.33)</b> | 1.11 (0.94, 1.30)        | <b>1.47 (1.27, 1.71)</b> | <b>1.45 (1.07, 1.93)</b> |
| Government support               | <b>1.11 (1.06, 1.17)</b> | 0.98 (0.87, 1.10)        | <b>1.12 (1.07, 1.18)</b> | 0.93 (0.83, 1.05)        | <b>1.23 (1.12, 1.36)</b> | 0.93 (0.75, 1.16)        |
| Household income                 | <b>0.86 (0.81, 0.92)</b> | 1.08 (0.95, 1.23)        | <b>0.84 (0.79, 0.89)</b> | 1.08 (0.95, 1.22)        | 0.87 (0.76, 1.01)        | 1.22 (0.98, 1.52)        |
| Relocation                       | <b>1.29 (1.18, 1.41)</b> | 1.10 (0.97, 1.24)        | <b>1.32 (1.21, 1.43)</b> | 1.11 (0.98, 1.25)        | <b>1.50 (1.25, 1.79)</b> | 1.17 (0.94, 1.46)        |

Note: Boldface indicates statistical significance (95% CI not including 1).

<sup>a</sup>Values assigned to each variable are in Appendix Table 1.

LMP, last menstrual period.

**Appendix**  
**Prenatal Drinking in the Northern Plains:**  
**Differences Between American Indian and Caucasian Mothers**  
**Ye et al.**

**Appendix Figure 1.** The number of drinks per drinking day during and after pregnancy by race.

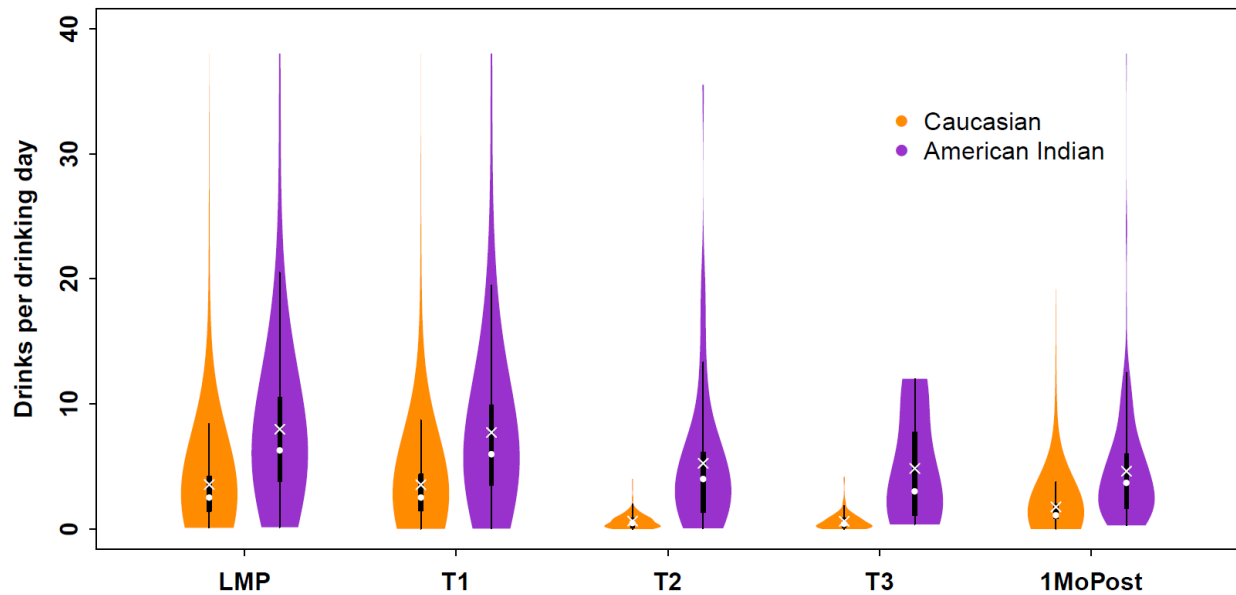

*Notes:* The number of drinks per drinking day was calculated for those who consumed alcoholic beverages at each time frame. The value was truncated at 38. Significant differences in the amount of alcohol were found between American Indian and Caucasian mothers at all time frames ( $p < 0.05$ , Wilcoxon rank-sum test). Median: white dot; mean: white cross sign; IQR: thick black bar; 95% CI: thin black bar.

LMP, last menstrual period; T1, first trimester; T2, second trimester; T3, third trimester, 1MoPost, 1 month post-delivery.



**Appendix**  
**Prenatal Drinking in the Northern Plains:**  
**Differences Between American Indian and Caucasian Mothers**  
**Ye et al.**

**Appendix Figure 2.** Frequency of binge drinking during and after pregnancy by race.

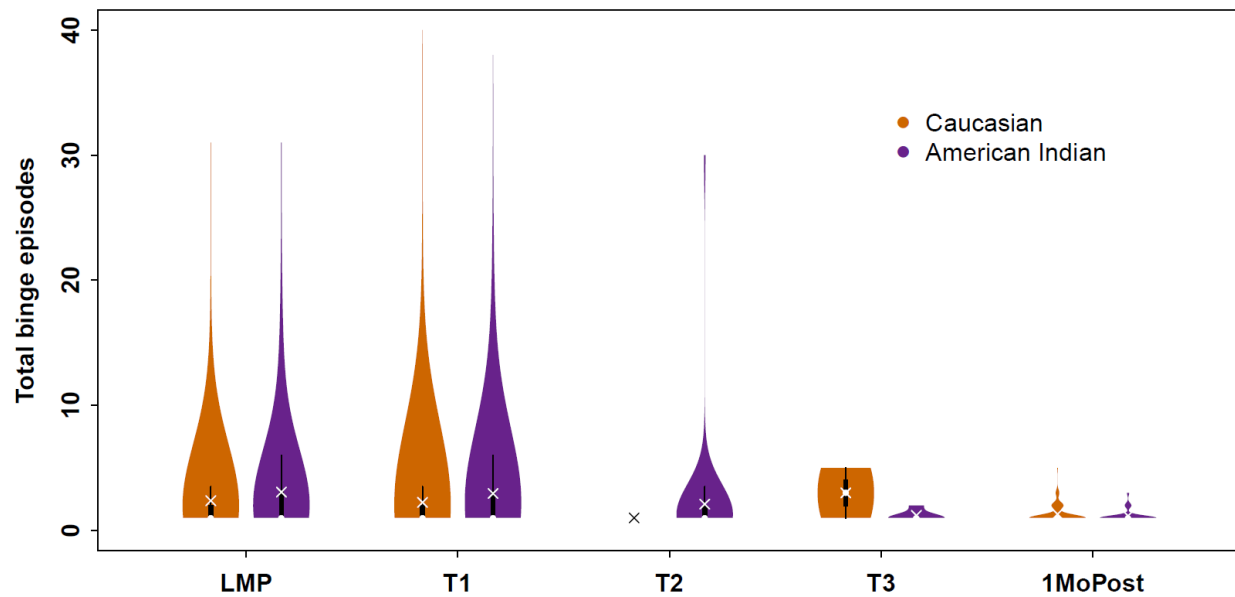

*Notes:* The number of total binge episodes was calculated for those who were binge drinkers at each time frame. Significant differences in the number of episodes were found between American Indian and Caucasian mothers 15 days before and after LMP and in the first trimester ( $p < 0.05$ , Wilcoxon rank-sum test). Median: white dot; mean: white cross sign; IQR: thick black bar; 95% CI: thin black bar. Only one Caucasian mother binged in the second trimester, represented by a black cross sign.

LMP, last menstrual period; T1, first trimester; T2, second trimester; T3, third trimester, 1MoPost, 1 month post-delivery.
